# Supplementary material for: Promotional effect of indium on CuO–CeO2 catalysts for low-temperature CO oxidation
Source: Royal Society of Chemistry journal article supplement (doi:10.1039/d2cy01490d), 2022-01-01
Supplement: d2cy01490d1.pdf [file d2cy01490d1.pdf]

## Supporting Information

### **Promotional Effect of Indium on the CuO-CeO<sub>2</sub> Catalysts for Low-Temperature CO Oxidation**

Hu Li<sup>a</sup>, Fei-Xiang Tian<sup>a</sup>, Qi Liu<sup>a</sup>, Yi-Fan Han<sup>a,\*</sup> and Minghui Zhu<sup>a,\*</sup>

<sup>a</sup> State Key Laboratory of Chemical Engineering, School of Chemical Engineering,  
East China University of Science and Technology, Shanghai 200237, China

\* Corresponding author E-mail: [yifanhan@ecust.edu.cn](mailto:yifanhan@ecust.edu.cn); [minghuizhu@ecust.edu.cn](mailto:minghuizhu@ecust.edu.cn)

. Supplementary figures

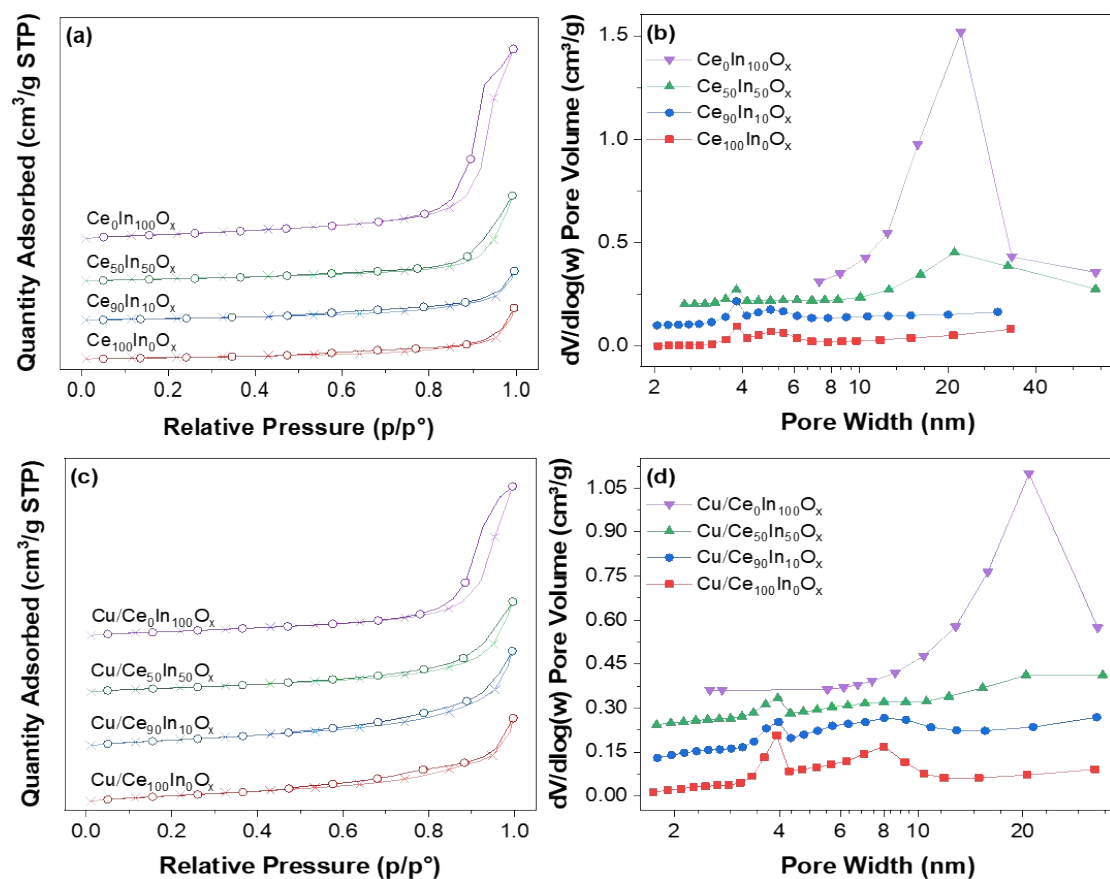

**Figure S1.** N<sub>2</sub> adsorption/desorption isotherms and pore size distributions of CeInO<sub>x</sub> (a-b) supports and Cu/CeInO<sub>x</sub> (c-d) catalysts.

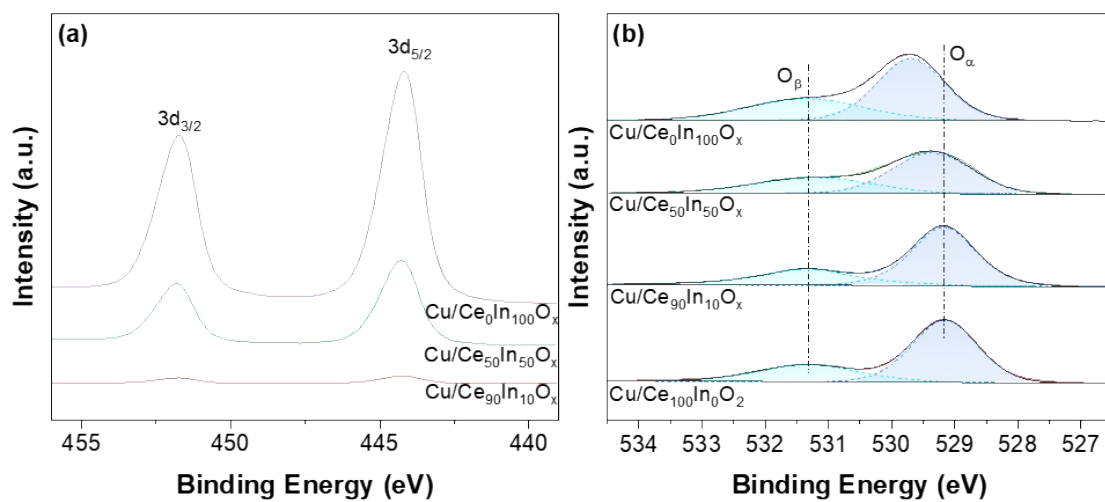

**Figure S2.** XPS spectra of the catalysts showing the (a) O 1s, (b) In 3d regions.

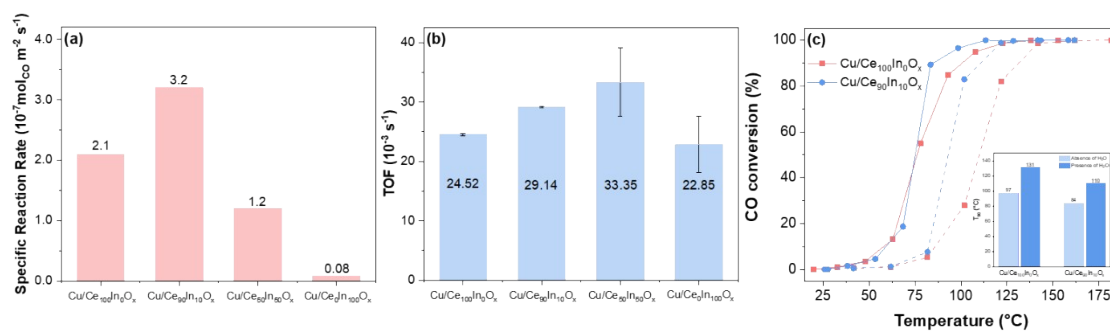

**Figure S3.** (a) Specific reaction rate and (b) TOF in the absence of 3 vol.% H<sub>2</sub>O over Cu/CeInO<sub>x</sub> catalysts at 90 °C. (c) Effect of H<sub>2</sub>O on CO conversion over Cu/CeInO<sub>x</sub> catalysts.

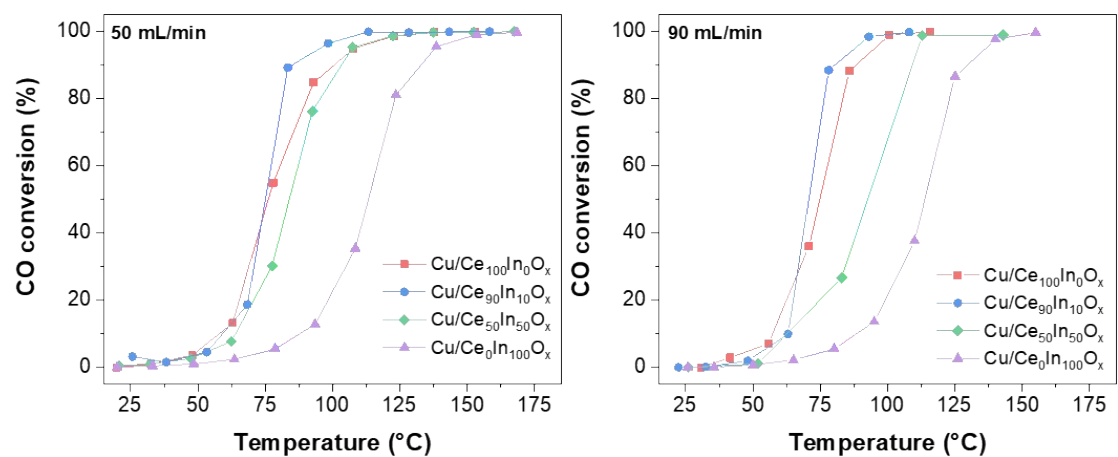

**Figure S4.** CO conversion of Cu/CeInO<sub>x</sub> catalysts at different flow rates (50 and 90 mL·min<sup>-1</sup>).

CO-TPD was also performed using the same micro-fixed-bed reactor connected to a GC-QMS (HPR-20, Hiden Analytical Ltd.). The pretreatment procedure was identical to the H<sub>2</sub>-TPR experiment. First, 50 mg catalyst was cooled down to room temperature in flowing Ar (Air Liquid, 99.999%). The catalyst was then saturated under a CO flow (1%CO/Ar) for 1 h and purged with Ar for 1.5 h to remove physically adsorbed CO molecules. The temperature was then ramped up to 850 °C at a rate of 10 °C·min<sup>-1</sup>.

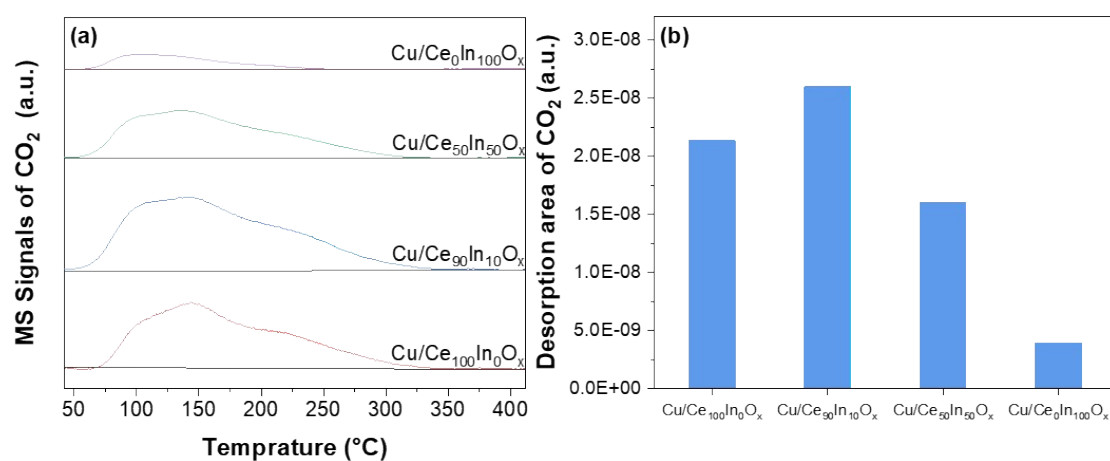

**Figure S5.** (a) CO-TPD profiles of Cu/CeInO<sub>x</sub> catalysts. (b) Desorption area of CO<sub>2</sub> during CO-TPD over Cu/CeInO<sub>x</sub> catalysts.

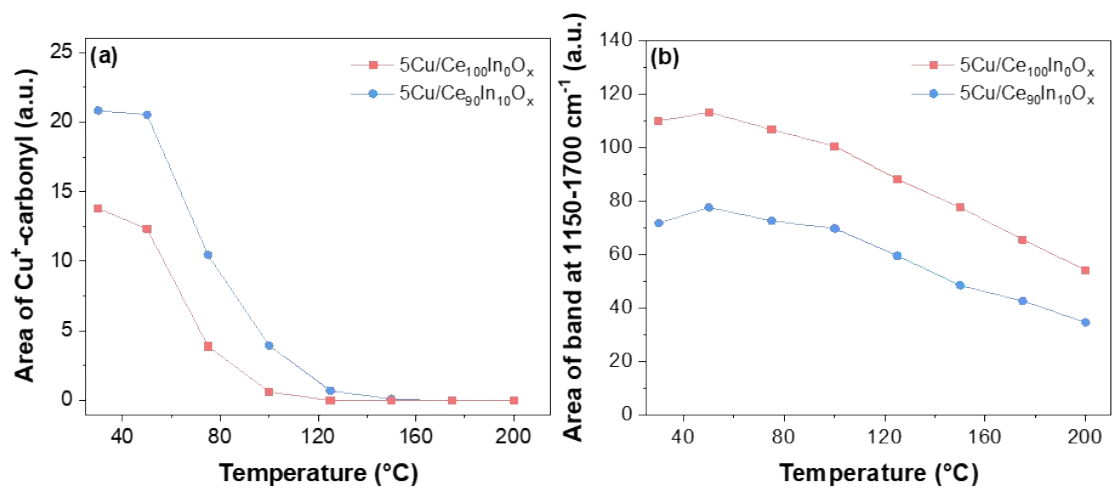

**Figure S6.** Integrated area of (a) CO-Cu<sup>+</sup> species and (b) the carbon-containing species in the 1150-1700 cm<sup>-1</sup> range as a function of the reaction temperature.

Scanning transmission electron microscopy (STEM) measurement was carried out on a ThermoFisher Talos F200X (Figure S7). Energy-dispersive X-ray spectroscopy (EDX) measurement was performed using 4 in-column Super-X detectors (Figure S8).

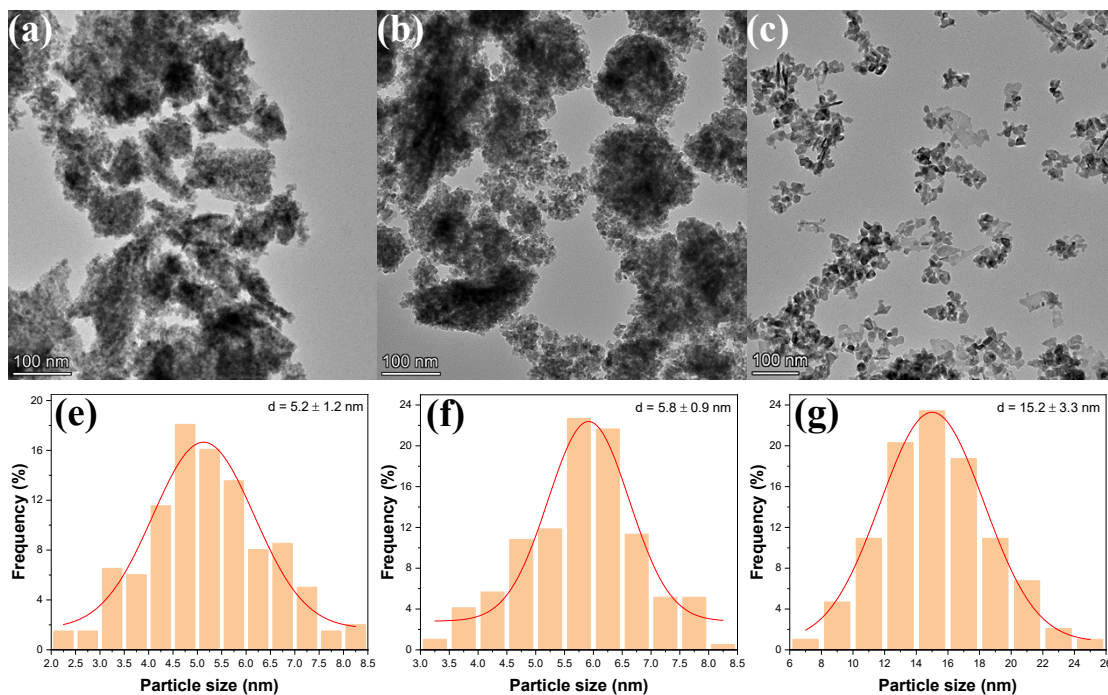

**Figure S7.** TEM images and the size distribution of different catalysts: (a, e) Cu/Ce<sub>100</sub>In<sub>0</sub>O<sub>x</sub>, (b, f) Cu/Ce<sub>90</sub>In<sub>10</sub>O<sub>x</sub>, and (c, g) Cu/Ce<sub>0</sub>In<sub>100</sub>O<sub>x</sub>.



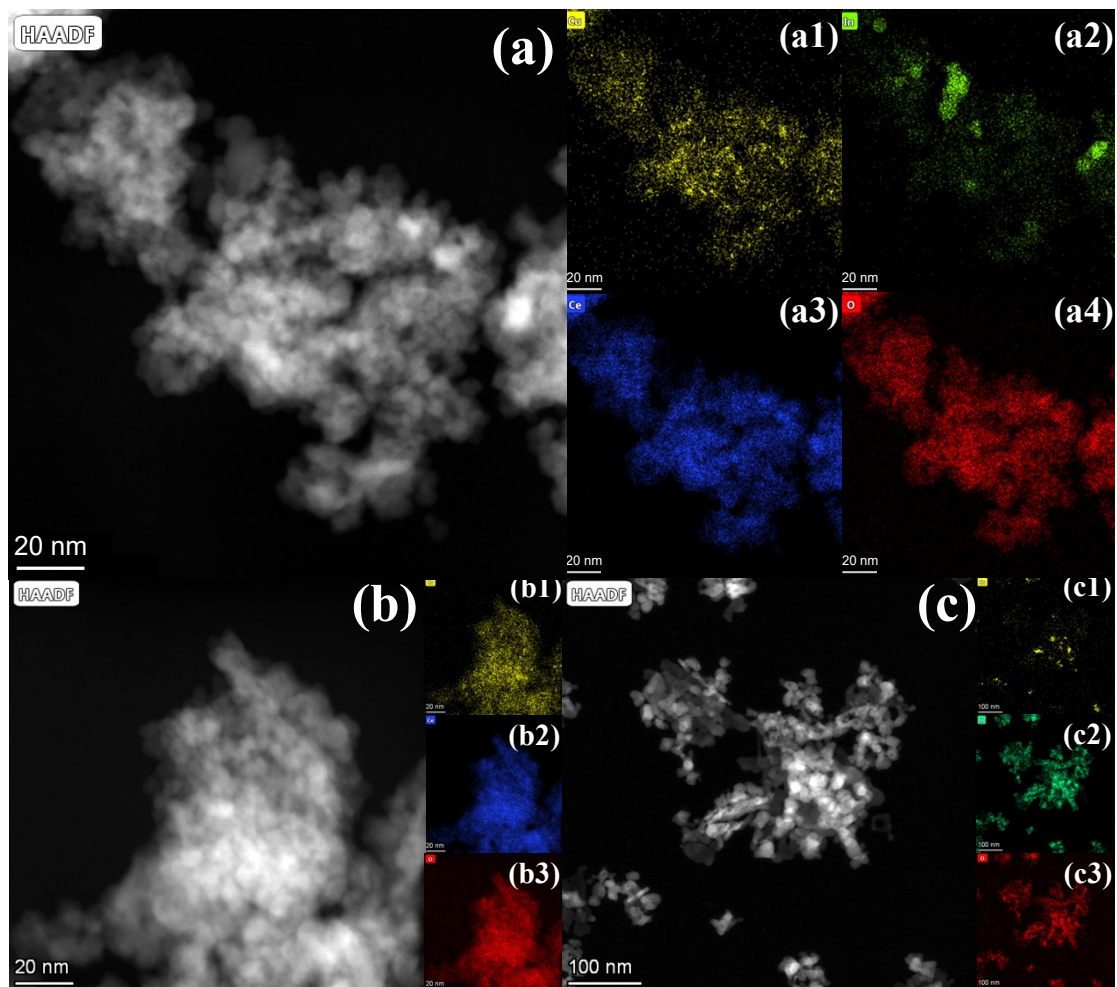

**Figure S8.** EDX-Mapping results of (a) Cu/Ce<sub>90</sub>In<sub>10</sub>O<sub>x</sub>, (b) Cu/Ce<sub>100</sub>In<sub>0</sub>O<sub>x</sub>, and (c) Cu/Ce<sub>0</sub>In<sub>100</sub>O<sub>x</sub>. The yellow, green, blue and red represent Cu, In, Ce and O, respectively.

## Supplementary tables

**Table S1**

The BET surface area, Barrett Joiner Halenda (BJH) pore volume, and pore size for the supports and catalysts.

| Sample                                              | Surface area<br>(m <sup>2</sup> /g) | Pore volume<br>(cm <sup>3</sup> /g) | Pore size<br>(nm) |
|-----------------------------------------------------|-------------------------------------|-------------------------------------|-------------------|
| Ce <sub>100</sub> In <sub>0</sub> O <sub>x</sub>    | 20.9                                | 0.067                               | 10.6              |
| Ce <sub>90</sub> In <sub>10</sub> O <sub>x</sub>    | 24.3                                | 0.068                               | 9.1               |
| Ce <sub>50</sub> In <sub>50</sub> O <sub>x</sub>    | 30.3                                | 0.181                               | 20.4              |
| Ce <sub>0</sub> In <sub>100</sub> O <sub>x</sub>    | 60.0                                | 0.401                               | 20.4              |
| Cu/Ce <sub>100</sub> In <sub>0</sub> O <sub>x</sub> | 66.7                                | 0.118                               | 6.9               |
| Cu/Ce <sub>90</sub> In <sub>10</sub> O <sub>x</sub> | 66.3                                | 0.159                               | 8.8               |
| Cu/Ce <sub>50</sub> In <sub>50</sub> O <sub>x</sub> | 48.5                                | 0.148                               | 11.4              |
| Cu/Ce <sub>0</sub> In <sub>100</sub> O <sub>x</sub> | 49.5                                | 0.281                               | 19.2              |

**Table S2**

The unit cell parameters and particle size of the supports and catalysts as determined by TOPAS. Results of the Sample Characterization by XRD.

| Sample                                              | CeO <sub>2</sub> lattice parameters (nm) | particle size (nm) |                                |
|-----------------------------------------------------|------------------------------------------|--------------------|--------------------------------|
|                                                     |                                          | CeO <sub>2</sub>   | In <sub>2</sub> O <sub>3</sub> |
| Ce <sub>100</sub> In <sub>0</sub> O <sub>x</sub>    | 0.5419                                   | 7.7                | -                              |
| Ce <sub>90</sub> In <sub>10</sub> O <sub>x</sub>    | 0.5416                                   | 8.2                | -                              |
| Ce <sub>50</sub> In <sub>50</sub> O <sub>x</sub>    | 0.5401                                   | 7.1                | 15.2                           |
| Ce <sub>0</sub> In <sub>100</sub> O <sub>x</sub>    | -                                        | -                  | 16.8                           |
| Cu/Ce <sub>100</sub> In <sub>0</sub> O <sub>x</sub> | 0.5418                                   | 7.9                | -                              |
| Cu/Ce <sub>90</sub> In <sub>10</sub> O <sub>x</sub> | 0.5419                                   | 7.2                | -                              |
| Cu/Ce <sub>50</sub> In <sub>50</sub> O <sub>x</sub> | 0.5399                                   | 7.3                | 15.3                           |
| Cu/Ce <sub>0</sub> In <sub>100</sub> O <sub>x</sub> | -                                        | -                  | 17.0                           |

**Table S3**

Quantified XPS Results for the catalysts.

| Catalyst                                            | Cu (mol %) | Ce <sup>3+</sup> /Ce (%) | I <sub>sat</sub> /I <sub>pp</sub> | Cu <sup>+</sup> /Cu (%) |
|-----------------------------------------------------|------------|--------------------------|-----------------------------------|-------------------------|
| Cu/Ce <sub>100</sub> In <sub>0</sub> O <sub>x</sub> | 9.07       | 20.9                     | 0.128                             | 60.4                    |
| Cu/Ce <sub>90</sub> In <sub>10</sub> O <sub>x</sub> | 10.29      | 21.3                     | 0.098                             | 66.7                    |
| Cu/Ce <sub>50</sub> In <sub>50</sub> O <sub>x</sub> | 7.27       | 13.6                     | 0.125                             | 59.0                    |
| Cu/Ce <sub>0</sub> In <sub>100</sub> O <sub>x</sub> | 4.43       | -                        | 0.114                             | 55.6                    |

**Table S4**

The residual Na content of the Cu/Ce<sub>90</sub>In<sub>10</sub>O<sub>x</sub> and Cu/Ce<sub>50</sub>In<sub>50</sub>O<sub>x</sub> catalyst by ICP-OES.

| Catalyst                                            | 0722-Na (wt.%) | 0915-Na (wt.%) |
|-----------------------------------------------------|----------------|----------------|
| Cu/Ce <sub>90</sub> In <sub>10</sub> O <sub>x</sub> | 0.421          | 0.295          |
| Cu/Ce <sub>50</sub> In <sub>50</sub> O <sub>x</sub> | 0.381          | 0.095          |

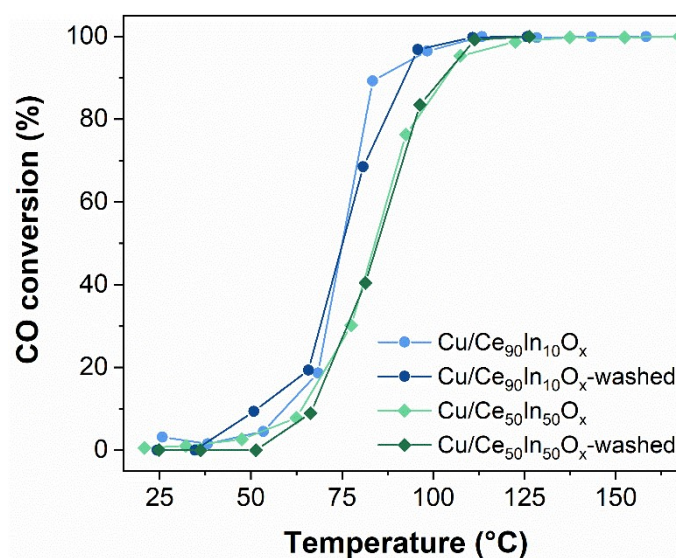

**Figure S9.** CO conversion of the Cu/Ce<sub>90</sub>In<sub>10</sub>O<sub>x</sub> and Cu/Ce<sub>50</sub>In<sub>50</sub>O<sub>x</sub> catalysts with different residual Na.

We have determined the residual Na content of the Cu/Ce<sub>90</sub>In<sub>10</sub>O<sub>x</sub> and Cu/Ce<sub>50</sub>In<sub>50</sub>O<sub>x</sub> catalysts prepared on July 22 and September 15 by ICP-OES (PE Avio200) (Table S4). ICP results show that the extensive washing step somewhat successfully removes Na. Steady-state activity measurements reveal that removal (or partial removal) of Na from these catalysts shows almost negligible impact on the CO oxidation activity especially under lower temperatures (Figure S9).
